# Supplementary material for: Wide QRS complex and the risk of major arrhythmic events in Brugada syndrome patients: A systematic review and meta‐analysis
Source: PubMed Central journal article supplement (PMC7011812; doi:10.1002/joa3.12290), 2019-12-27

Meta-analysis estimates, given named study is omitted

| Lower CI Limit

○ Estimate

| Upper CI Limit

de Asmundis et al., 2017

Calò et al., 2016

Ikeda et al., 2005

Junttila et al., 2008

Kawata et al., 2013

Tokioka et al., 2014

Yamagata et al., 2017

0.92 1.04

1.55

2.30

2.60

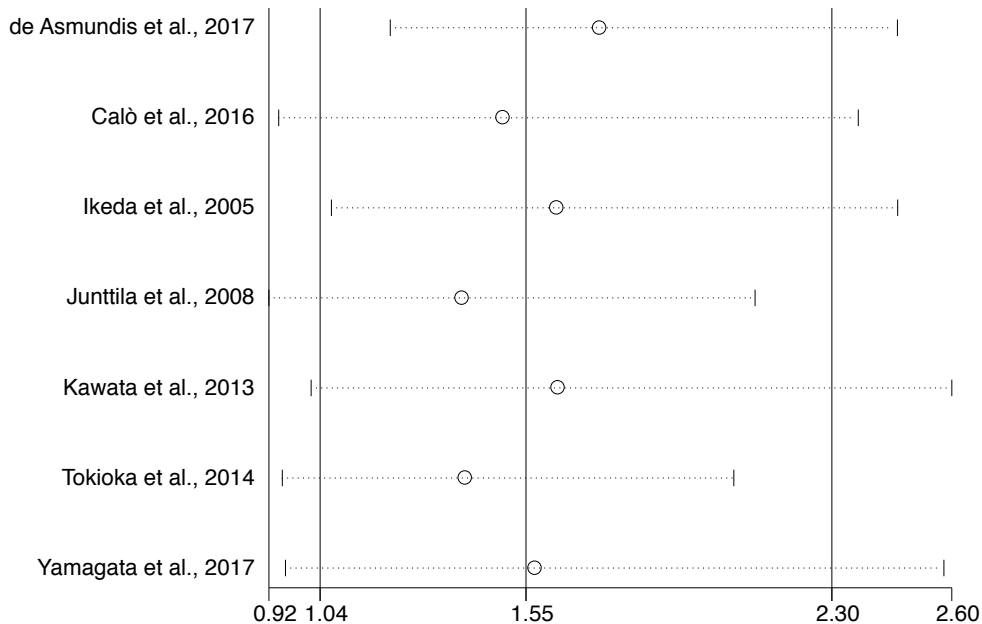

Supplement: JOA3-36-143-s003.pdf [file JOA3-36-143-s003.pdf]
